# Supplementary material
Source: PubMed Central journal article supplement (PMC7363052)
Supplement: NIHMS1585863-supplement-1.pdf [file NIHMS1585863-supplement-1.pdf]

## Journal of Hepatology

### CTAT methods

Tables for a “Complete, Transparent, Accurate and Timely account” (CTAT) are now mandatory for all revised submissions. The aim is to enhance the reproducibility of methods.

- Only include the parts relevant to your study
- Refer to the CTAT in the main text as ‘Supplementary CTAT Table’
- Do not add subheadings
- Add as many rows as needed to include all information
- Only include one item per row

If the CTAT form is not relevant to your study, please outline the reasons why:

|  |
|--|
|  |
|--|

#### 1.1 Antibodies

| Name                                | Citation          | Supplier                  | Cat no.  | Clone no. |
|-------------------------------------|-------------------|---------------------------|----------|-----------|
| Anti-Integrin $\alpha$ v            | PMID:<br>29743605 | Santa Cruz                | Sc-9969  | N/A       |
| Anti-Integrin $\beta$ 3             | PMID:<br>22270917 | Santa Cruz                | Sc-46655 | N/A       |
| Anti-Integrin $\alpha$ v/ $\beta$ 3 | PMID:<br>30517646 | Santa Cruz                | Sc-7312  | N/A       |
| Anti- $\alpha$ -SMA                 | PMID:<br>30651793 | Abcam                     | Ab5694   | N/A       |
| Anti-CD68                           | PMID:<br>30237493 | Cell Signaling Technology | 76437S   | N/A       |
| $\beta$ -actin                      | PMID:<br>16424156 | Sigma Life Science        | A2228    | N/A       |

#### 1.2 Cell lines

| Name | Citation | Supplier | Cat no. | Passage no. | Authentication test method |
|------|----------|----------|---------|-------------|----------------------------|
| N/A  | N/A      | N/A      | N/A     | N/A         | N/A                        |

#### 1.3 Organisms

| Name | Citation | Supplier                 | Strain | Sex  | Age      | Overall n number |
|------|----------|--------------------------|--------|------|----------|------------------|
| CD1  | N/A      | Charles River Laboratory | CD1    | Male | 10 Weeks | 40               |

#### 1.4 Sequence based reagents

| Name         | Sequence                                  | Supplier |
|--------------|-------------------------------------------|----------|
| IL-1 $\beta$ | GAACCAAGCAACGACAAA<br>GCAGACTCAAACCTCCACT | IBT      |

|                |                                                   |     |
|----------------|---------------------------------------------------|-----|
| TGF- $\beta$ 1 | CTCCCGTGGCTTCTAGTGC<br>GCCTTAGTTTGGACAGGATCTG     | IBT |
| Vimentin       | CTGTACGAGGAGGAGATGCG<br>AATTTCTTCCTGCAAGGATT      | IBT |
| TIMP1          | GCATGGACATTTATTCTCCACTGT<br>TCTCTAGGAGCCCCGATCTG  | IBT |
| $\alpha$ -SMA  | TCAGCGCCTCCAGTTCCT<br>AAAAAAAAACCACGAGTAACAAATCAA | IBT |
| COL1A1         | TTCACCTACAGCACGCTTGTG<br>GATGACTGTCTTGCCCCAAGT    | IBT |
| GAPDH          | CCATGGAGA AGGCTGGGG<br>CAAAGTTGTCATGGATGACC       | IBT |

## 1.5 Biological samples

| Description    | Source | Identifier |
|----------------|--------|------------|
| Tissues, Blood | Mouse  | N/A        |
| Tissues        | Human  | N/A        |

## 1.6 Deposited data

| Name of repository | Identifier | Link |
|--------------------|------------|------|
| N/A                | N/A        | N/A  |

## 1.7 Software

| Software name | Manufacturer | Version |
|---------------|--------------|---------|
| Image Lab     | Bio-rad      | 5.2.1   |
| ImageJ        | NIH          | 1.8     |
| Prism         | GraphPad     | 6.0     |
| Excel         | Microsoft    | 2016    |
| QIIME         | SCIKIT-BIO   | 1.9     |
| ASIProVM      | Siemens      | N/A     |
| Inveon        | Siemens      | N/A     |

## 1.8 Other (e.g. drugs, proteins, vectors etc.)

|                                 |                             |  |
|---------------------------------|-----------------------------|--|
| FITC-E(PEG4-RGDfK) <sub>2</sub> | [ <sup>18</sup> F]-Alfatide |  |
|                                 |                             |  |

## 1.9 Please provide the details of the corresponding methods author for the manuscript:

|                                                                                                                                                                                                                                                                      |
|----------------------------------------------------------------------------------------------------------------------------------------------------------------------------------------------------------------------------------------------------------------------|
| <p>Steven Liang, PhD<br/>           Email: <a href="mailto:Liang.Steven@mgh.harvard.edu">Liang.Steven@mgh.harvard.edu</a><br/>           Phone: +1-617-230-5491<br/>           Fax: +1-617-726-6165<br/>           Address: 55 Fruit St., Boston, MA, 02114, USA</p> |
|----------------------------------------------------------------------------------------------------------------------------------------------------------------------------------------------------------------------------------------------------------------------|

**2.0** Please confirm for randomised controlled trials all versions of the clinical protocol are included in the submission. These will be published online as supplementary information.

|     |
|-----|
| N/A |
|-----|
